# Supplementary material for: Anti-Inflammatory and Analgesic Effects of Curcumin Nanoparticles Associated with Diclofenac Sodium in Experimental Acute Inflammation
Source: MDPI journal article supplement (doi:10.3390/ijms231911737), 2022-10-03
Supplement: s1 [file s1]

## Supplementary Tables

# Anti-Inflammatory and Analgesic Effects of Curcumin Nanoparticles Associated with Diclofenac Sodium in Experimental Acute Inflammation

Ioana Boarescu, Raluca Maria Pop, Paul-Mihai Boarescu, Ioana Corina Bocşan, Dan Gheban, Ruxandra-Mioara Râjnoveanu, Armand Râjnoveanu, Adriana Elena Bulboacă, Anca Dana Buzoianu and Sorana D. Bolboacă

**Table S1.** Motility test response by groups

| Group Abbreviation | 1 hour    |   |   | 3 hours   |   |   | 5 hours   |   |   | 7 hours   |   |   | 24 hours  |   |   |
|--------------------|-----------|---|---|-----------|---|---|-----------|---|---|-----------|---|---|-----------|---|---|
|                    | Score (n) |   |   | Score (n) |   |   | Score (n) |   |   | Score (n) |   |   | Score (n) |   |   |
|                    | 2         | 1 | 0 | 2         | 1 | 0 | 2         | 1 | 0 | 2         | 1 | 0 | 2         | 1 | 0 |
| C                  | 8         | 0 | 0 | 8         | 0 | 0 | 8         | 0 | 0 | 8         | 0 | 0 | 8         | 0 | 0 |
| AI                 | 0         | 4 | 4 | 0         | 4 | 4 | 0         | 1 | 7 | 0         | 2 | 6 | 0         | 4 | 4 |
| AID                | 5         | 3 | 0 | 0         | 5 | 3 | 0         | 4 | 4 | 1         | 7 | 0 | 3         | 5 | 0 |
| AIcC200            | 1         | 5 | 2 | 0         | 5 | 3 | 0         | 3 | 5 | 1         | 3 | 4 | 0         | 6 | 2 |
| AIcC200D           | 4         | 4 | 0 | 3         | 4 | 1 | 0         | 7 | 1 | 2         | 4 | 2 | 4         | 4 | 0 |
| AInC200            | 3         | 5 | 0 | 0         | 7 | 1 | 0         | 4 | 4 | 0         | 6 | 2 | 1         | 5 | 2 |
| AInC200D           | 6         | 2 | 0 | 5         | 2 | 1 | 0         | 8 | 0 | 1         | 7 | 0 | 7         | 1 | 0 |

**Notes:** Data are expressed as absolute frequencies. A score of 2 indicates no motility problems; a score of 1 indicates some motility problems (walk with difficulty, but with the toe of the inflamed paw touching the floor), and a score of 0 indicates motility problems (walk with difficulties and avoided touching the right hind paw to the floor). Abbreviations: C—control; AI—Acute inflammation; D—Diclofenac sodium; cC—conventional curcumin solution (200 mg/kg b.w.); nC—curcumin nanoparticles solution (200 mg/kg b.w.); n, number – absolute frequency.

**Table S2.** Nociceptive thresholds by groups on paw pressure test.

| Group Abbreviation | 1 hour    | 3 hours   | 5 hours   | 7 hours   | 24 hours  |
|--------------------|-----------|-----------|-----------|-----------|-----------|
| C                  | 7.4 (0.9) | 7.2 (0.7) | 7.4 (0.6) | 7.5 (0.7) | 7.5 (0.8) |
| AI                 | 6.1 (0.8) | 3.9 (0.4) | 2.7 (0.3) | 3.7 (0.4) | 5.1 (0.2) |
| AID                | 6.6 (0.6) | 4.8 (0.5) | 3.7 (0.4) | 4.7 (0.5) | 6.2 (0.5) |
| AIcC200            | 6.3 (0.8) | 4 (0.3)   | 3.3 (0.3) | 4.1 (0.5) | 5.5 (0.8) |
| AIcC200D           | 6.7 (0.3) | 5.2 (0.2) | 4.3 (0.5) | 5.4 (0.4) | 6.3 (0.4) |
| AInC200            | 6.2 (0.4) | 4.3 (0.4) | 3.6 (0.5) | 4.4 (0.4) | 5.8 (0.4) |
| AInC200D           | 6.8 (0.4) | 5.6 (0.5) | 5.1 (0.4) | 5.8 (0.5) | 6.7 (0.4) |

**Notes:** values expressed as mean (standard deviation), n=8 for each group. Abbreviations: C, control; AI, Acute inflammation; D, Diclofenac ; cC, conventional curcumin solution (200 mg/kg b.w.); nC, curcumin nanoparticles solution (200 mg/kg b.w.).

**Table S3.** Comparisons between nociceptive thresholds by groups expressed as p-values.

| Group Abbreviation | 1 hour  | 3 hours | 5 hours | 7 hours | 24 hours |
|--------------------|---------|---------|---------|---------|----------|
| AI vs.<br>C        | 0.0649  | <0.0001 | <0.0001 | <0.0001 | <0.0001  |
| AID vs.<br>C       | >0.9999 | 0.0753  | 0.0165  | 0.0224  | 0.5845   |
| AI                 | >0.9999 | 0.5731  | 0.2979  | 0.4246  | 0.0753   |
| AIcC200 vs.<br>C   | 0.0633  | <0.0001 | 0.0002  | 0.0001  | 0.0009   |
| AI                 | >0.9999 | >0.9999 | >0.9999 | >0.9999 | >0.9999  |
| AID                | >0.9999 | 0.8711  | >0.9999 | >0.9999 | >0.9999  |
| AIcC200D vs.<br>C  | >0.9999 | >0.9999 | 0.6693  | >0.9999 | >0.9999  |
| AI                 | >0.9999 | 0.0285  | 0.0052  | 0.0037  | 0.0270   |
| AID                | >0.9999 | >0.9999 | >0.9999 | >0.9999 | >0.9999  |
| AIcC200            | >0.9999 | 0.0505  | 0.4160  | 0.1400  | 0.5845   |
| AInC200 vs.<br>C   | 0.0682  | 0.0007  | 0.0046  | 0.0016  | 0.0190   |
| AI                 | >0.9999 | >0.9999 | 0.7224  | >0.9999 | >0.9999  |
| AID                | >0.9999 | >0.9999 | >0.9999 | >0.9999 | >0.9999  |
| AIcC200D vs.<br>C  | >0.9999 | >0.9999 | >0.9999 | >0.9999 | >0.9999  |
| AI                 | 0.9205  | 0.0033  | <0.0002 | 0.0005  | 0.00120  |
| AID                | >0.9999 | >0.9999 | 0.5296  | >0.9999 | >0.9999  |
| AInC200            | 0.9547  | 0.1056  | 0.2104  | 0.1968  | 0.5403   |

**Notes:** Abbreviations: AI, Acute inflammation; D, Diclofenac; cC, conventional curcumin solution (200 mg/kg b.w.); nC, curcumin nanoparticles solution (200 mg/kg b.w.).

**Table S4.** Reactions time to the heat in hot plate test, by groups.

| Group Abbreviation | 1 hour    | 3 hours   | 5 hours    | 7 hours   | 24 hours  |
|--------------------|-----------|-----------|------------|-----------|-----------|
| C                  | 9.8 (1.1) | 9.9 (1.1) | 10.2 (1.1) | 9.6 (1)   | 9.9 (0.9) |
| AI                 | 6.5 (0.5) | 5.1 (0.5) | 3.2 (0.4)  | 3.9 (0.3) | 5.8 (0.9) |
| AID                | 7.1 (0.6) | 7.3 (0.7) | 6.8 (0.8)  | 6.6 (0.4) | 7 (0.6)   |
| AIcC200            | 6.3 (0.6) | 5.4 (0.5) | 4.2 (0.3)  | 5.2 (0.4) | 6.3 (0.6) |
| AIcC200D           | 7.3 (0.5) | 7.8 (0.3) | 7.7 (0.4)  | 7.3 (0.6) | 7.3 (0.5) |
| AInC200            | 6.5 (0.6) | 6.5 (0.5) | 5.7 (0.4)  | 6.2 (0.5) | 6.6 (0.4) |
| AInC200D           | 7.7 (0.7) | 8.8 (0.7) | 8.6 (0.5)  | 8.7 (0.5) | 8.4 (0.6) |

**Notes:** values expressed as mean (standard deviation), n=8 for each group. Abbreviations: C, control; AI, Acute inflammation; D, Diclofenac ; cC, conventional curcumin solution (200 mg/kg b.w.); nC, curcumin nanoparticles solution (200 mg/kg b.w.).

**Table S5.** Comparisons expressed as p-values between reactions time to the heat, in hot plate, by groups.

| Abbreviations     | 1 hour  | 3 hours | 5 hours | 7 hours | 24 hours |
|-------------------|---------|---------|---------|---------|----------|
| AI vs.<br>C       | 0.0002  | <0.0001 | <0.0001 | <0.0001 | <0.0001  |
| AID vs.<br>C      | 0.1246  | 0.1925  | 0.1082  | 0.1275  | 0.0260   |
| AI                | >0.9999 | 0.1334  | 0.0545  | 0.0772  | >0.9999  |
| AIcC200 vs.<br>C  | <0.0001 | <0.0001 | <0.0001 | <0.0001 | <0.0001  |
| AI                | >0.9999 | >0.9999 | >0.9999 | >0.9999 | >0.9999  |
| AID               | >0.9999 | 0.3832  | 0.7938  | >0.9999 | >0.9999  |
| AIcC200D vs.<br>C | 0.3175  | 0.9722  | >0.9999 | >0.9999 | 0.2463   |
| AI                | 0.9547  | 0.0175  | 0.0025  | 0.0036  | 0.2256   |
| AID               | >0.9999 | >0.9999 | >0.9999 | >0.9999 | >0.9999  |
| AIcC200           | 0.4891  | 0.0618  | 0.0753  | 0.1336  | 0.8122   |
| AInC200 vs.<br>C  | 0.0006  | 0.0052  | 0.0031  | 0.0102  | 0.0014   |
| AI                | >0.9999 | >0.9999 | 0.9205  | 0.6441  | >0.9999  |
| AID               | >0.9999 | >0.9999 | >0.9999 | >0.9999 | >0.9999  |
| AInC200D vs.<br>C | >0.9999 | >0.9999 | >0.9999 | >0.9999 | >0.9999  |
| AI                | 0.0735  | 0.0001  | <0.0001 | <0.0001 | 0.0013   |
| AID               | >0.9999 | >0.9999 | >0.9999 | 0.5845  | 0.5496   |
| AInC200           | 0.1535  | 0.0893  | 0.1056  | 0.0682  | 0.0604   |

**Notes:** Abbreviations: AI, Acute inflammation; D, Diclofenac ; cC, conventional curcumin solution (200 mg/kg b.w.); nC, curcumin nanoparticles solution (200 mg/kg b.w.).

**Table S6.** Pro-inflammatory cytokines for plasma and tissue levels by groups.

| Group Abbreviation | TNF- $\alpha$ [pg/mL] |               | IL-6 [pg/mL] |              | IL-1 $\beta$ [pg/mL] |              |
|--------------------|-----------------------|---------------|--------------|--------------|----------------------|--------------|
|                    | plasma                | tissue        | plasma       | tissue       | plasma               | tissue       |
| C                  | 60.9 (14.1)           | 125.4 (31.9)  | 130.2 (13.1) | 123.1 (18)   | 173.9 (9.9)          | 197.1 (15)   |
| AI                 | 126.5 (14.8)          | 546.5 (107.5) | 323.3 (58.7) | 486.6 (61.7) | 381.5 (49)           | 548 (64.3)   |
| AID                | 79.5 (9.8)            | 257 (87.9)    | 212.1 (16.3) | 289 (16.9)   | 243.9 (11.8)         | 331.5 (18.4) |
| AIcC200            | 120.2 (9.6)           | 284 (51.9)    | 247.4 (38.4) | 353.7 (31)   | 321 (37.6)           | 407.8 (69.3) |
| AIcC200D           | 88.7 (13.2)           | 226 (58.3)    | 161.9 (12.4) | 228.1 (16.8) | 220.8 (22.7)         | 281.5 (30.3) |
| AInC200            | 93.7 (11.5)           | 257 (29.6)    | 171.7 (18.4) | 295.2 (39.8) | 270.2 (27.6)         | 330.3 (49)   |
| AInC200D           | 68.1 (8.6)            | 132.4 (21.1)  | 138.5 (14.9) | 191.9 (31.7) | 203.3 (11.2)         | 214 (23.3)   |

**Notes:** values expressed as mean (standard deviation), n=8 for each group. Abbreviations: TNF- $\alpha$ , Tumoral necrosis  $\alpha$ ; IL-6, Interleukin 6 ; IL-1 $\beta$ , Interleukin 1 $\beta$ ; C, control; AI, Acute inflammation; D, Diclofenac ; cC, conventional curcumin solution (200 mg/kg b.w.); nC, curcumin nanoparticles solution (200 mg/kg b.w.).

**Table S7.** Comparisons expressed as p-values between pro-inflammatory cytokines for plasma and tissue levels, by groups.

| Group Abbreviation | TNF- $\alpha$<br>[pg/mL] |         | IL-6<br>[pg/mL] |         | IL-1 $\beta$<br>[pg/mL] |         |
|--------------------|--------------------------|---------|-----------------|---------|-------------------------|---------|
|                    | plasma                   | tissue  | plasma          | tissue  | plasma                  | tissue  |
| AI vs.<br>C        | <0.0001                  | <0.0001 | <0.0001         | <0.0001 | <0.0001                 | <0.0001 |
| AID vs.<br>C       | >0.9999                  | 0.1082  | 0.0052          | 0.0161  | 0.0531                  | 0.0293  |
| AI                 | 0.0170                   | 0.1643  | >0.9999         | 0.2454  | 0.1400                  | 0.3753  |
| AIcC200 vs.<br>C   | <0.0001                  | 0.0044  | 0.0002          | <0.0001 | <0.0001                 | 0.0003  |
| AI                 | >0.9999                  | >0.9999 | >0.9999         | >0.9999 | >0.9999                 | >0.9999 |
| AID                | 0.0380                   | >0.9999 | >0.9999         | >0.9999 | >0.9999                 | >0.9999 |
| AIcC200D vs.<br>C  | 0.3242                   | 0.6318  | >0.9999         | >0.9999 | 0.9722                  | >0.9999 |
| AI                 | 0.2508                   | 0.0212  | 0.0077          | 0.0016  | 0.0039                  | 0.0054  |
| AID                | >0.9999                  | >0.9999 | >0.9999         | >0.9999 | >0.9999                 | >0.9999 |
| AIcC200            | 0.4699                   | >0.9999 | 0.1466          | 0.0872  | 0.0717                  | 0.2916  |
| AInC200 vs.<br>C   | 0.1275                   | 0.0175  | 0.8240          | 0.0097  | 0.0041                  | 0.0195  |
| AI                 | 0.5960                   | 0.7224  | 0.02300         | 0.3600  | 0.9374                  | 0.5090  |
| AID                | >0.9999                  | >0.9999 | >0.9999         | >0.9999 | >0.9999                 | >0.9999 |
| AInC200D vs.<br>C  | >0.9999                  | >0.9999 | >0.9999         | >0.9999 | >0.9999                 | >0.9999 |
| AI                 | <0.0002                  | <0.0001 | <0.0001         | <0.0001 | 0.0001                  | <0.0001 |
| AID                | >0.9999                  | 0.1570  | 0.0212          | 0.5193  | >0.9999                 | 0.1644  |
| AInC200            | 0.3453                   | 0.0270  | >0.9999         | 0.3600  | 0.2508                  | 0.1161  |

**Notes:** Abbreviations: TNF- $\alpha$ , Tumoral necrosis  $\alpha$ ; IL-6, Interleukin 6; IL-1 $\beta$ , Interleukin 1 $\beta$ ; C, control; AI, Acute inflammation; D, Diclofenac; cC, conventional curcumin solution (200 mg/kg b.w.); nC, curcumin nanoparticles solution (200 mg/kg b.w.).
